# Supplementary material
Source: MDPI journal article supplement (https://www.mdpi.com/2076-3263/12/10/361)
Supplement: s1 [file s1]

# A Detailed Liquefaction Susceptibility Map of Nestos River Delta, Thrace, Greece Based on Surficial Geology and Geomorphology

Maria Taftoglou <sup>1</sup>, Sotirios Valkaniotis <sup>1</sup>, George Papathanassiou <sup>2,\*</sup>, Nikos Klimis <sup>1</sup> and Ioannis Dokas <sup>1</sup>

<sup>1</sup> Department of Civil Engineering, Democritus University of Thrace, University Campus, 671 00 Xanthi, Greece

<sup>2</sup> Department of Geology, Aristotle University of Thessaloniki, 541 24 Thessaloniki, Greece

\* Correspondence: gpatha@geo.auth.gr

**Table S1.** KH-4 Corona declassified imagery frames used.

| Year | Source | ID               | Date<br>yyyy-mm-dd | Resolution<br>(m) |
|------|--------|------------------|--------------------|-------------------|
| 1960 | KH-4A  | DS009009009DV081 | 1960-08-18         | ~3m               |
| 1968 | KH-4B  | DS1104-1058DF092 | 1968-08-11         | ~3m               |

**Table S2.** Ground control point coordinates (meters) and residuals after triangulation of KH-4A frame DS009009009DV081. Coordinates in Greek Geodetic Reference System 1987.

| Point ID | X      | Y       | H    | dX    | dY    |
|----------|--------|---------|------|-------|-------|
| 1        | 574299 | 4542017 | 12.0 | -0.96 | -0.49 |
| 2        | 546697 | 4535298 | 7.6  | 3.70  | -0.60 |
| 3        | 569467 | 4531291 | 7.9  | -5.86 | 1.36  |
| 4        | 558301 | 4524983 | 0.6  | 0.14  | 0.81  |
| 5        | 557280 | 4538201 | 18.2 | -0.91 | 0.35  |
| 6        | 584090 | 4533551 | 0.0  | 5.09  | 0.84  |
| 7        | 575297 | 4536330 | 7.4  | -1.23 | -2.28 |

Total RMSE of 7 image points: RMSE<sub>x</sub>=3.321, RMSE<sub>y</sub>=1.143

**Table S3.** Ground control point coordinates (meters) and residuals after triangulation of KH-4B frame DS1104-1058DF092. Coordinates in Greek Geodetic Reference System 1987.

| Point ID | X      | Y       | H   | dX    | dY    |
|----------|--------|---------|-----|-------|-------|
| 1        | 546682 | 4535293 | 7.4 | -3.47 | -4.60 |
| 2        | 582007 | 4531043 | 0.0 | -5.61 | 4.86  |

|                                                                                   |        |         |       |       |        |
|-----------------------------------------------------------------------------------|--------|---------|-------|-------|--------|
| 3                                                                                 | 571895 | 4527258 | 1.0   | 5.62  | -0.85  |
| 4                                                                                 | 565596 | 4539173 | 19.6  | 5.16  | 7.00   |
| 5                                                                                 | 554720 | 4529023 | 4.5   | 4.58  | -0.77  |
| 6                                                                                 | 573342 | 4538157 | 34.4  | -4.22 | -10.38 |
| 7                                                                                 | 581512 | 4539242 | 34.0  | 4.81  | -3.97  |
| 8                                                                                 | 561567 | 4536592 | 18.0  | 7.75  | 12.05  |
| 9                                                                                 | 575818 | 4533478 | 2.4   | -3.10 | -3.66  |
| 10                                                                                | 566264 | 4534707 | 12.1  | -8.40 | 4.73   |
| 11                                                                                | 549783 | 4537919 | 330.8 | -3.09 | -4.38  |
| Total RMSE of 11 image points: RMSE <sub>x</sub> =5.338, RMSE <sub>y</sub> =6.170 |        |         |       |       |        |

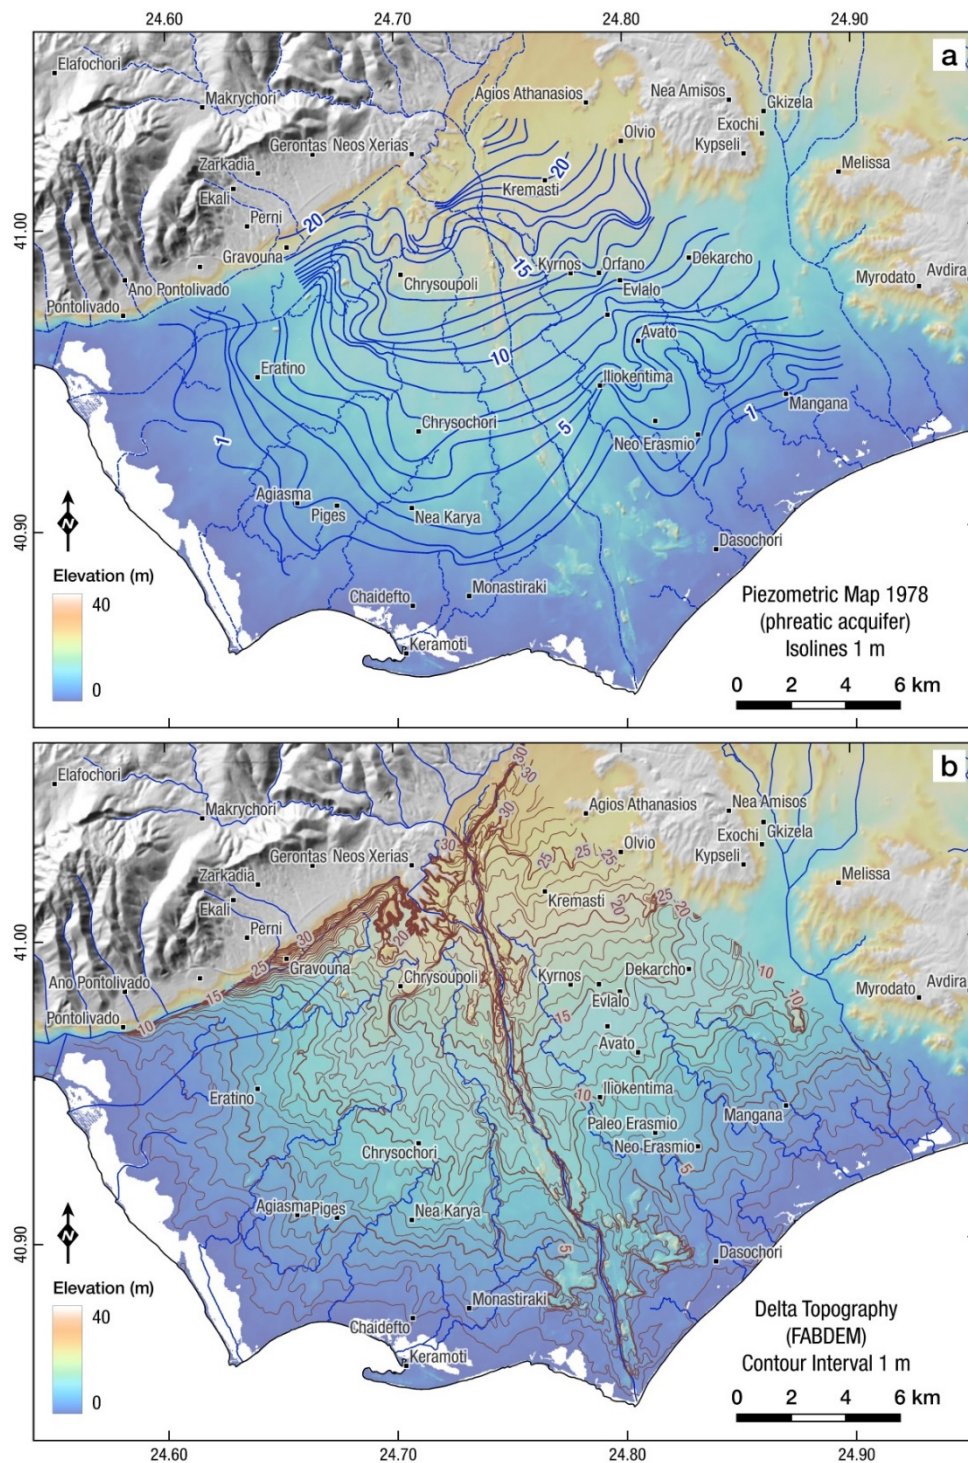

**Figure S1.** a) Piezometric map of the phreatic/unconfined aquifer in October 1978. Piezometric isolines with thick blue lines (1m interval). b) Topographic map of Nestos delta area, with 1 meter contours. Contours extracted and simplified from FABDEM digital terrain model [1,2]



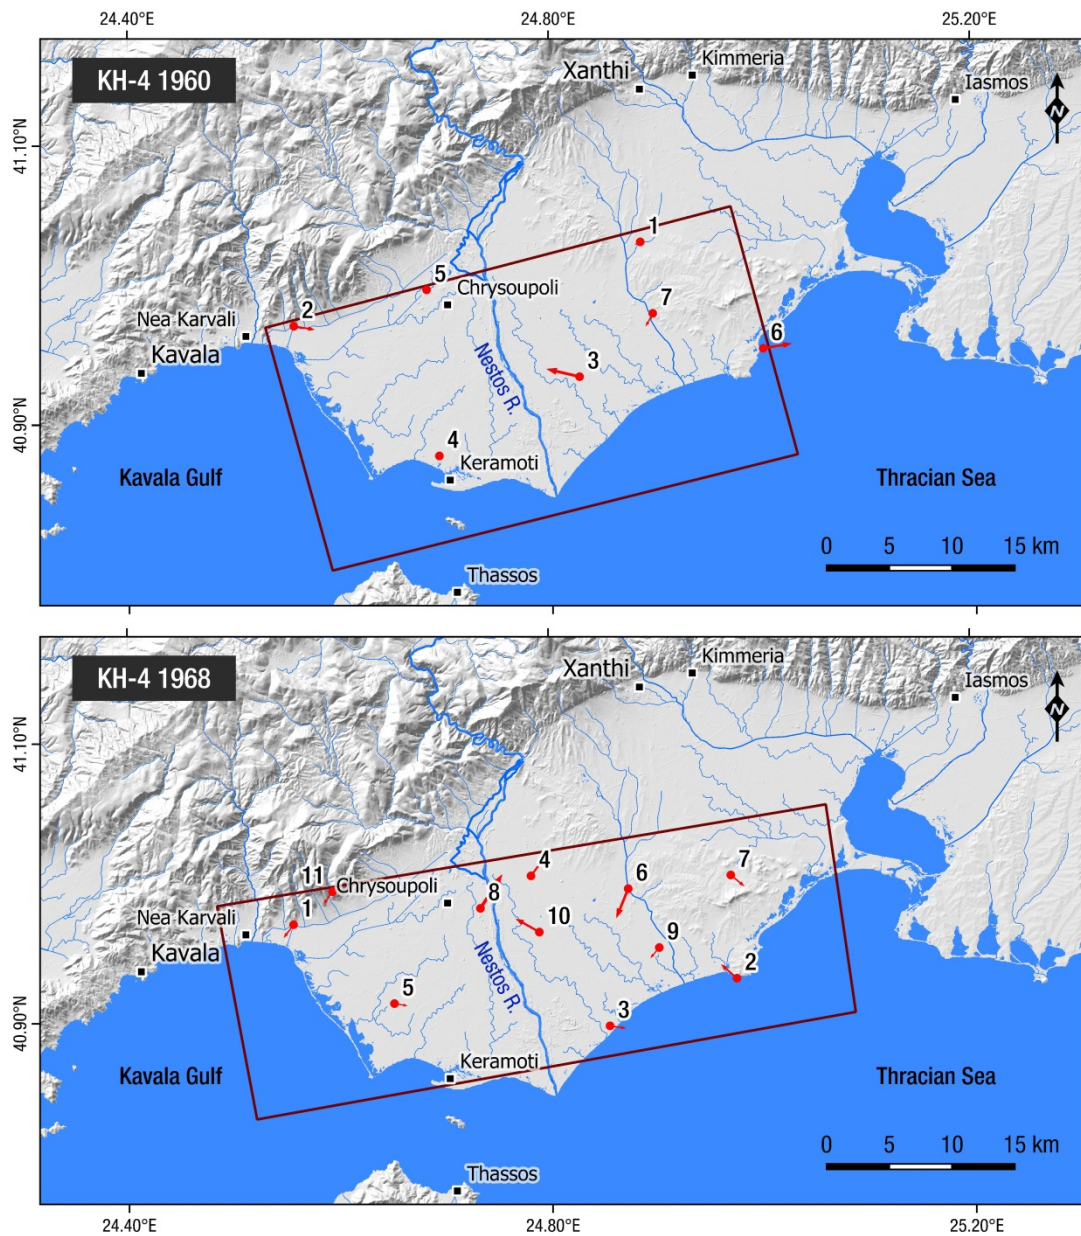

**Figure S2.** Outline of KH-4 Corona frames and ground control points used for orthorectification. Red arrows show GCP residuals from tables S2 and S3.

1. Stournaras, G. Evolution et Comportement d un Systeme Aquifer Heterogene. Geologie et Hydrogeology du Delta Nestos (Greece) et de ses Bordures, Doctoral Thesis, Univ. Grenoble, Grenoble, France, 1984.
2. Hawker, L.; Uhe, P.; Paulo, L.; Sosa, J.; Savage, J.; Sampson, C.; Neal, J. A 30 m global map of elevation with forests and buildings removed. *Environ. Res. Lett.* 2022, 17, 024016.
